# Supplementary material for: Vibrio harveyi Infection Significantly Alters Amino Acid and Carbohydrate Metabolism in Whiteleg Shrimp, Litopenaeus vannamei
Source: MDPI journal article supplement (doi:10.3390/metabo10060265), 2020-06-25
Supplement: s1 [file s1]

Supplementary Figure 2

(a)

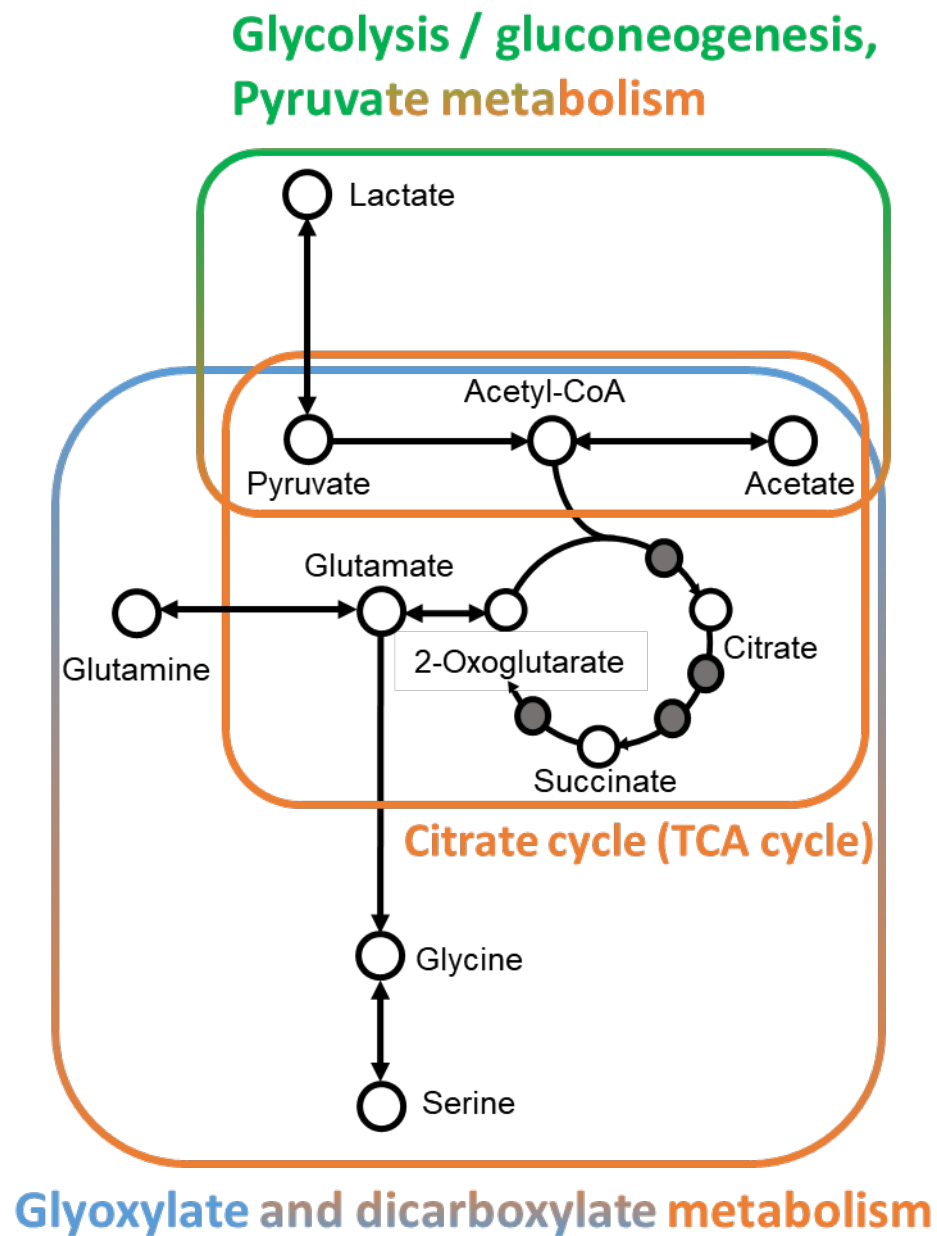

(b)

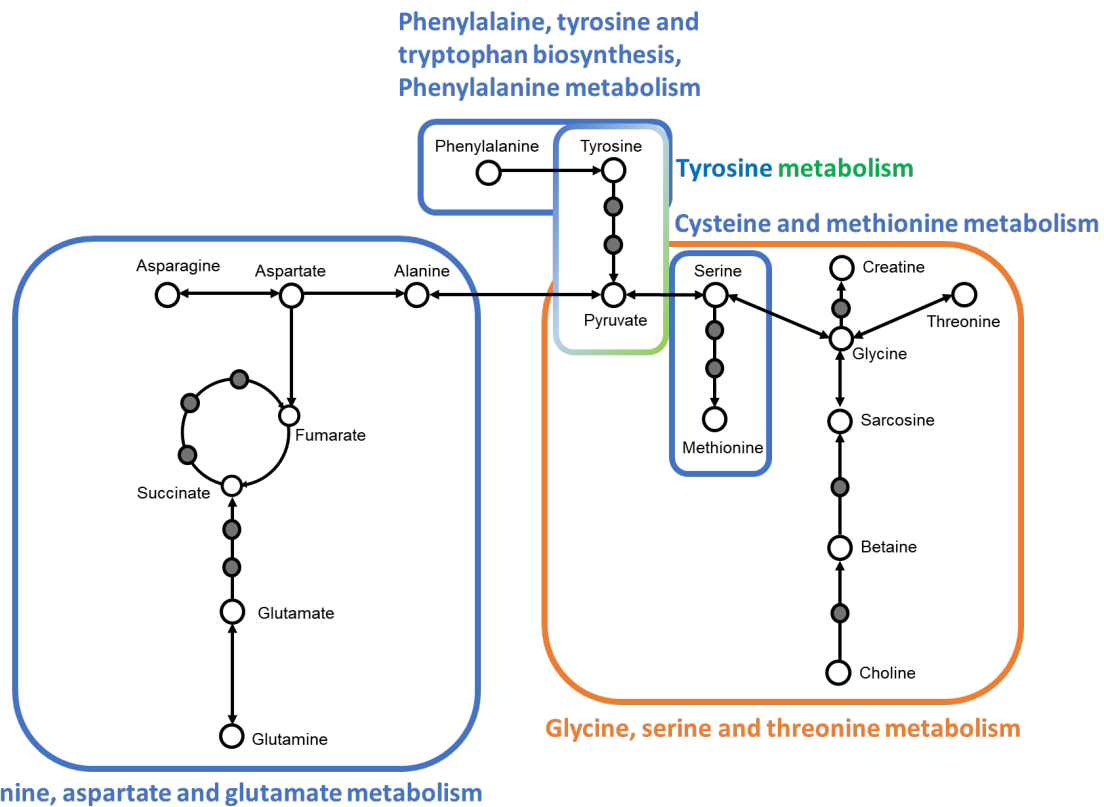

**Figure S2.** Metabolic pathways related to carbohydrate metabolism (a) and amino acid metabolism (b) in tissues of *V. harveyi* infected shrimp. The changes in each tissue was illustrated as color: gill, green; hepatopancreas, blue; hemolymph, orange. The mixed colour represents the pathway changed in common. The grey circle represents the intermediates between metabolites.
