# Supplementary material for: Vibrio harveyi Infection Significantly Alters Amino Acid and Carbohydrate Metabolism in Whiteleg Shrimp, Litopenaeus vannamei
Source: MDPI journal article supplement (doi:10.3390/metabo10060265), 2020-06-25
Supplement: s1 [file s1]

## Supplementary Table 1

**Table S1.** Classification of assigned metabolites in gill, hepatopancreas and haemolymph of *Litopenaeus vannamei*.

| Metabolite       | HMDB ID     | Class                     | Tissue                           |
|------------------|-------------|---------------------------|----------------------------------|
| Alanine          | HMDB0000161 | Amino acids               | Gill, hepatopancreas, haemolymph |
| Betaine          | HMDB0000043 | Amino acids               | Gill, hepatopancreas, haemolymph |
| Choline          | HMDB0000097 | Quaternary ammonium salts | Gill, hepatopancreas, haemolymph |
| Glucose          | HMDB0000122 | Carbohydrates             | Gill, hepatopancreas, haemolymph |
| Glutamate        | HMDB0000148 | Amino acids               | Gill, hepatopancreas, haemolymph |
| Glycerol         | HMDB0000131 | Carbohydrates             | Gill, hepatopancreas, haemolymph |
| Glycine          | HMDB0000123 | Amino acids               | Gill, hepatopancreas, haemolymph |
| Isoleucine       | HMDB0000172 | Amino acids               | Gill, hepatopancreas, haemolymph |
| Lactate          | HMDB0000190 | Alpha hydroxy acids       | Gill, hepatopancreas, haemolymph |
| Leucine          | HMDB0000687 | Amino acids               | Gill, hepatopancreas, haemolymph |
| Succinate        | HMDB0000254 | Dicarboxylic acids        | Gill, hepatopancreas, haemolymph |
| Valine           | HMDB0000883 | Amino acids               | Gill, hepatopancreas, haemolymph |
| Carnitine        | HMDB0000062 | Quaternary ammonium salts | Gill, hepatopancreas             |
| Lysine           | HMDB0000182 | Amino acids               | Gill, hepatopancreas             |
| Methionine       | HMDB0000696 | Amino acids               | Gill, hepatopancreas             |
| O-Phosphocholine | HMDB0001565 | Quaternary ammonium salts | Gill, hepatopancreas             |
| Phenylalanine    | HMDB0000159 | Amino acids               | Gill, hepatopancreas             |

|                        |             |                      |                    |
|------------------------|-------------|----------------------|--------------------|
| Sarcosine              | HMDB0000271 | Amino acids          | Gill, hepatopaneas |
| Taurine                | HMDB0000251 | Organosulfonic acids | Gill, hepatopaneas |
| Threonine              | HMDB0000167 | Amino acids          | Gill, hepatopaneas |
| Tyrosine               | HMDB0000158 | Amino acids          | Gill, hepatopaneas |
| Uracil                 | HMDB0000300 | Pyrimidines          | Gill, hepatopaneas |
| Acetate                | HMDB0000042 | Carboxylic acids     | Gill, haemolymph   |
| Pyruvate               | HMDB0000243 | Alpha-keto acids     | Gill, haemolymph   |
| Arginine               | HMDB0000517 | Amino acids          | Gill               |
| Dimethylamine          | HMDB0000087 | Amines               | Gill               |
| Ethylmalonate          | HMDB0000622 | Fatty acids          | Gill               |
| Glutarate              | HMDB0000661 | Dicarboxylic acids   | Gill               |
| Glutathione            | HMDB0000125 | Amino acids          | Gill               |
| Histidine              | HMDB0000177 | Amino acids          | Gill               |
| Malonate               | HMDB0000691 | Dicarboxylic acids   | Gill               |
| Ornithine              | HMDB0000214 | Amino acids          | Gill               |
| Ribose                 | HMDB0000283 | Carbohydrates        | Gill               |
| Trimethylamine N-oxide | HMDB0000925 | Aminoxides           | Gill               |
| Uridine                | HMDB0000296 | -                    | Gill               |
| Asparagine             | HMDB0000168 | Amino acids          | Hepatopaneas       |
| Aspartate              | HMDB0000191 | Amino acids          | Hepatopaneas       |
| Fumarate               | HMDB0000134 | Dicarboxylic acids   | Hepatopaneas       |
| Glutamine              | HMDB0000641 | Amino acids          | Hepatopaneas       |
| Proline                | HMDB0000162 | Amino acids          | Hepatopaneas       |
| Serine                 | HMDB0000187 | Amino acids          | Hepatopaneas       |
| Trimethylamine         | HMDB0000906 | Amines               | Hepatopaneas       |
| Citrate                | HMDB0000094 | Tricarboxylic acids  | Haemolymph         |
| Creatine               | HMDB0000064 | Amino acids          | Haemolymph         |

---
