# Supplementary material for: Vibrio harveyi Infection Significantly Alters Amino Acid and Carbohydrate Metabolism in Whiteleg Shrimp, Litopenaeus vannamei
Source: MDPI journal article supplement (doi:10.3390/metabo10060265), 2020-06-25
Supplement: s1 [file s1]

## Supplementary Figure 1

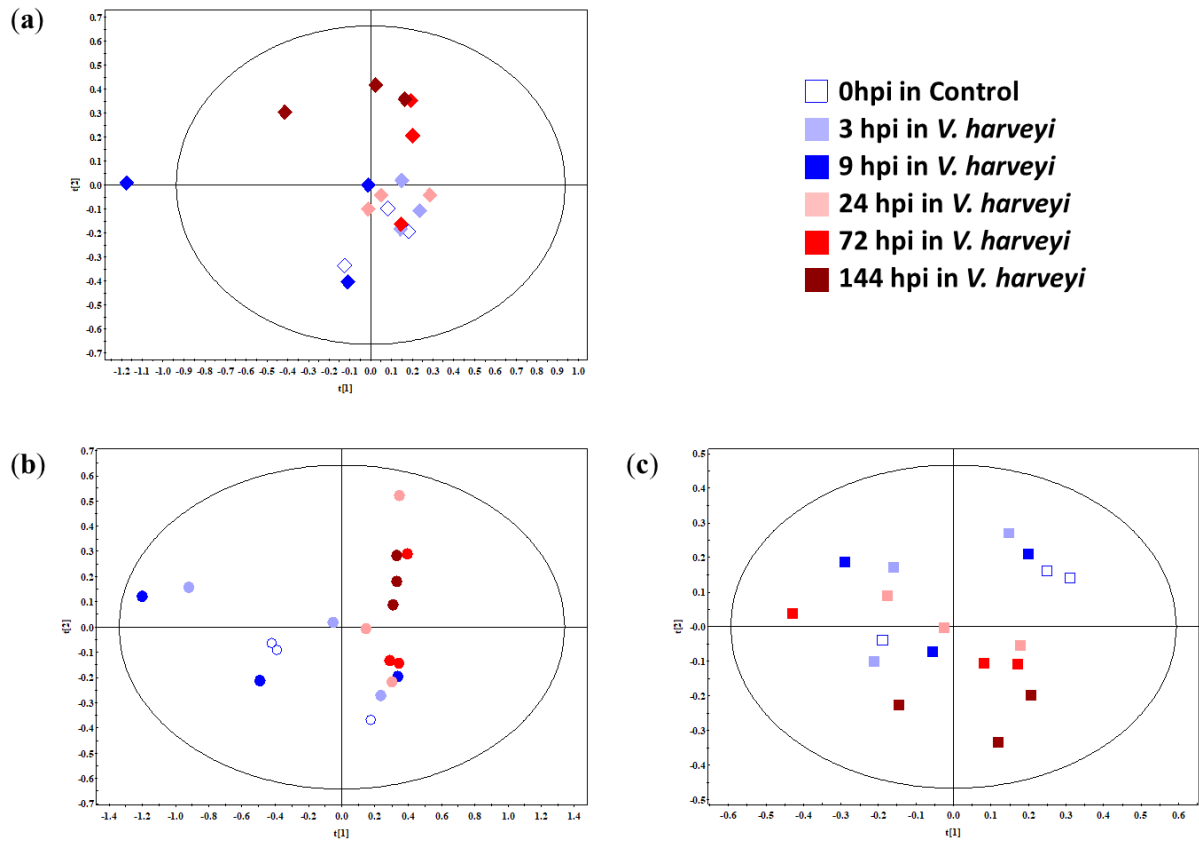

**Figure S1.** Principle Component Analysis (PCA) score plots based on the Nuclear Magnetic Resonance (NMR) spectra of the (a) gills (◇, diamond), (b) hepatopancreas (○, circle), and (c) haemolymph (□, square) from the whiteleg shrimp (*Litopenaeus vannamei*) infected with *Vibrio harveyi*. The classification parameters for the PCA score plot were as follows:  $R^2X = 0.711$  and  $Q^2 = 0.335$ ,  $R^2X = 0.926$  and  $Q^2 = 0.627$ , and  $R^2X = 0.836$  and  $Q^2 = 0.203$  for the gills, hepatopancreas and haemolymph, respectively. □, 0 hpi in the control group; ■, 3 hpi; ■, 9 hpi; ■, 24 hpi; ■, 72 hpi; ■, 144 hpi in the *V. harveyi* infected group.
