# Supplementary material for: Vibrio harveyi Infection Significantly Alters Amino Acid and Carbohydrate Metabolism in Whiteleg Shrimp, Litopenaeus vannamei
Source: MDPI journal article supplement (doi:10.3390/metabo10060265), 2020-06-25
Supplement: s1 [file s1]

### Supplementary Figure 3

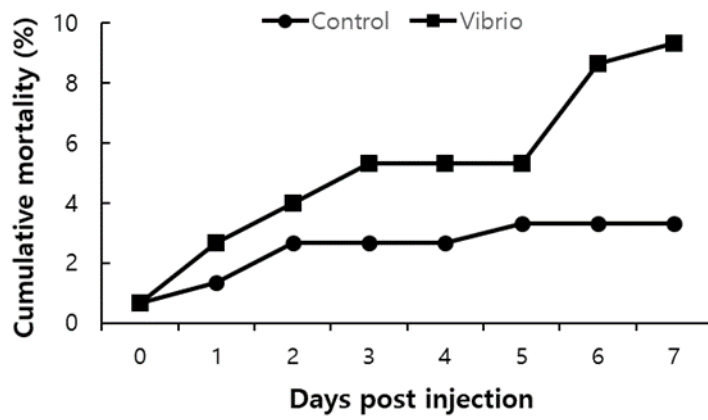

**Figure S3.** Cumulative mortality of control (Control) and *Vibrio harveyi* (Vibrio) infected groups. The final mortality reached at 3.3 and 9.3% at 7 days in control and *V. harveyi*-infected groups, respectively.
