# Supplementary material for: Vibrio harveyi Infection Significantly Alters Amino Acid and Carbohydrate Metabolism in Whiteleg Shrimp, Litopenaeus vannamei
Source: MDPI journal article supplement (doi:10.3390/metabo10060265), 2020-06-25
Supplement: s1 [file s1]

## Supplementary Table 2

**Table S2.** Variable Importance in Projection (VIP) scores calculated by Partial Least Square (PLS).

| <b>Gill</b>              |                  | <b>Hepatopancreas</b>    |                  | <b>Haemolymph</b>        |                  |
|--------------------------|------------------|--------------------------|------------------|--------------------------|------------------|
| <b>Metabolites (ppm)</b> | <b>VIP score</b> | <b>Metabolites (ppm)</b> | <b>VIP score</b> | <b>Metabolites (ppm)</b> | <b>VIP score</b> |
| Betaine (3.256)          | 18.94            | Betaine (3.249)          | 11.73            | Glucose (3.256)          | 8.15             |
| Taurine (3.249)          | 7.34             | Isoleucine (1.279)       | 5.84             | Citrate (2.537)          | 7.15             |
| Acetate (1.91)           | 6.40             | Taurine (3.417)          | 5.67             | Glycine (3.556)          | 4.49             |
| Carnitine (3.269)        | 5.74             | Lactate (1.312)          | 3.91             | Lactate (1.315)          | 3.88             |
| PC (3.21)                | 5.13             | Leucine (0.945)          | 3.86             | Acetate (1.91)           | 2.29             |
| Glycine (3.554)          | 4.25             | Methionine (2.12)        | 3.86             | Succinate (2.395)        | 2.21             |
| Glucose (3.394)          | 4.18             | Phenylalanine (3.115)    | 3.16             |                          |                  |
| Lactate (1.315)          | 2.79             | Carnitine (3.213)        | 3.14             |                          |                  |
| Glycerol (3.555)         | 2.58             | Glutamate (2.339)        | 2.14             |                          |                  |
| Ribose (4.096)           | 2.26             | Tyrosine (6.879)         | 1.86             |                          |                  |

\*PC: O-phosphocholine
